# Supplementary material for: Effects of Diagnostic Inclusion Criteria on Prevalence and Population Characteristics in Database Research
Source: Atypon-hosted journal article supplement (doi:10.1176/appi.ps.201400115), 2014-12-17
Supplement: appi.ps.201400115.ds001.pdf [file appi.ps.201400115.ds001.pdf]

**On-Line Supplement:**

**Effects of Diagnostic Criteria on Prevalence and Population Characteristics  
in Administrative Database Research on Serious Mental Illness**

eFigures: 1

eTables: 1

**eFigure 1:** Panel A depicts the overall bipolar population, identified by one encounter for bipolar disorder in FY2010 (group A) and two subpopulations: those identified by two outpatient or one inpatient encounter(s) (group B) and those identified by any two (inpatient or outpatient) encounters (group C). Panel B depicts group B, identified without applying exclusion criteria for the occurrence of competing diagnoses of schizophrenia spectrum disorders, and two subpopulations: those without a competing diagnosis for the 12 months prior to meeting bipolar criteria (group D), and those without a competing diagnosis since the beginning of the study in FY2002 (group E). Subpopulation graphics are not drawn to scale.

**eFigure: Bipolar Disorder, 2010**

**Panel A: Inclusion Criteria**

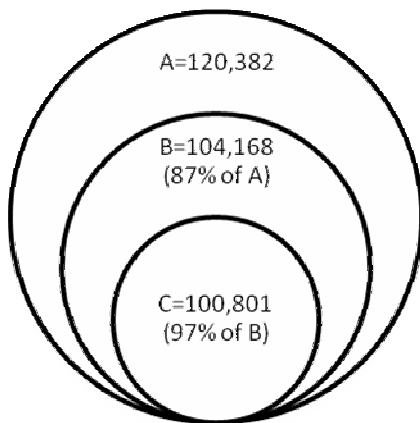

**Panel B: Exclusion Criteria**

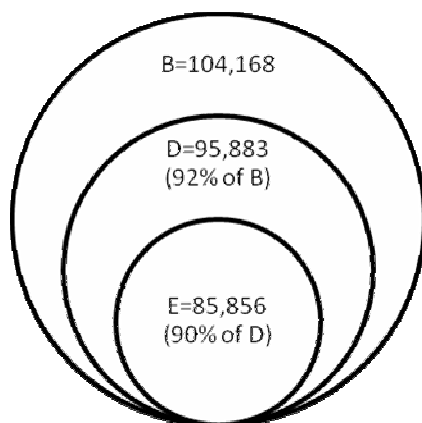

**eTable 1**

| <b>Supplement Table: Time Trend Analysis for Annual Number of Patients by Diagnosis from FY2003 to 2010</b> |                        |                           |           |                |
|-------------------------------------------------------------------------------------------------------------|------------------------|---------------------------|-----------|----------------|
| <b>Diagnosis</b>                                                                                            | <b>Sample Subgroup</b> | <b>Parameter Estimate</b> | <b>se</b> | <b>p-value</b> |
| Bipolar Disorder                                                                                            | A                      | 0.055                     | 0.003     | <.0001         |
|                                                                                                             | B                      | 0.065                     | 0.002     | <.0001         |
|                                                                                                             | C                      | 0.067                     | 0.002     | <.0001         |
|                                                                                                             | D                      | 0.075                     | 0.002     | <.0001         |
|                                                                                                             | E                      | 0.067                     | 0.003     | <.0001         |
| Schizophrenia                                                                                               | A                      | -0.013                    | 0.002     | 0.0010         |
|                                                                                                             | B                      | -0.008                    | 0.001     | 0.0006         |
|                                                                                                             | C                      | -0.007                    | 0.001     | 0.0015         |
|                                                                                                             | D                      | -0.007                    | 0.001     | 0.0003         |
|                                                                                                             | E                      | -0.032                    | 0.002     | <.0001         |
| PTSD                                                                                                        | A                      | 0.117                     | 0.002     | <.0001         |
|                                                                                                             | B                      | 0.120                     | 0.002     | <.0001         |
|                                                                                                             | C                      | 0.121                     | 0.002     | <.0001         |
|                                                                                                             | D                      | 0.123                     | 0.003     | <.0001         |
|                                                                                                             | E                      | 0.118                     | 0.002     | <.0001         |

\* Note: The dependent variable is the logarithmically transformed number of patients each year; the independent variable is year.
